# Supplementary material for: Investigation of coastal sea-fog formation using the WIBS (Wideband Integrated Bioaerosol Sensor) technique
Source: Copernicus journal article supplement (doi:10.5194/acp-2018-673), 2018-08-13
Supplement: Supplementary file 1 [file acp-2018-673-supplement.pdf]

## **Supplementary Material**

### **Investigation of marine boundary fog formation by use of the WBS (Wideband Integrated Bioaerosol Sensor) located at Haulbowline Island, Co. Cork**

Shane M. Daly<sup>1</sup>, David J. O'Connor<sup>2</sup>, David A. Healy<sup>1</sup>, Stig Hellebust<sup>1</sup>, Jovanna Arndt<sup>1</sup>, Eoin J. McGillicuddy<sup>1</sup>, Patrick Feeney<sup>1</sup>, Michael Quirke<sup>1</sup>, John C. Wenger<sup>1</sup>, John R. Sodeau<sup>1</sup>

1. School of Chemistry and Environmental Research Institute, University College Cork, Ireland.

2. School of Chemical and Pharmaceutical Sciences, Dublin Institute of Technology, Dublin, Ireland.

Correspondence to: John R. Sodeau ([j.sodeau@ucc.ie](mailto:j.sodeau@ucc.ie))

Keywords: Iodine, fluorescence detection, optical microscopy, marine aerosols

July 15<sup>th</sup> – 16<sup>th</sup>

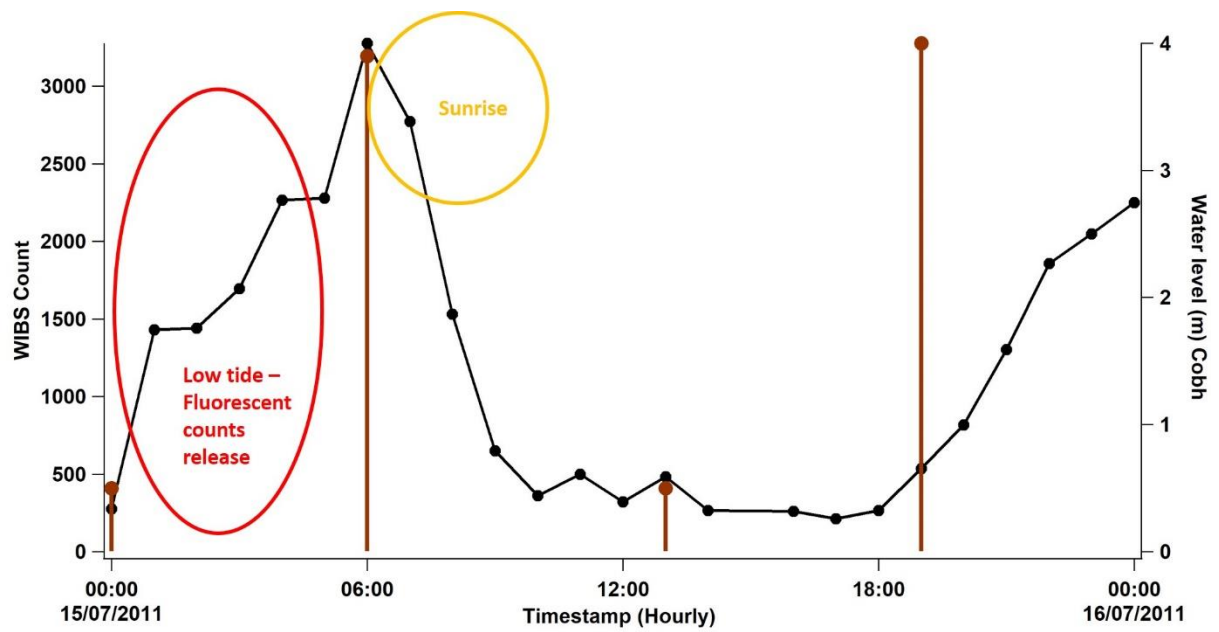

Figure 1: WIBS count, solar and tidal profiles of Haulbowline during the 15<sup>th</sup>-16<sup>th</sup> July 2011

July 23<sup>rd</sup> – 25<sup>th</sup>

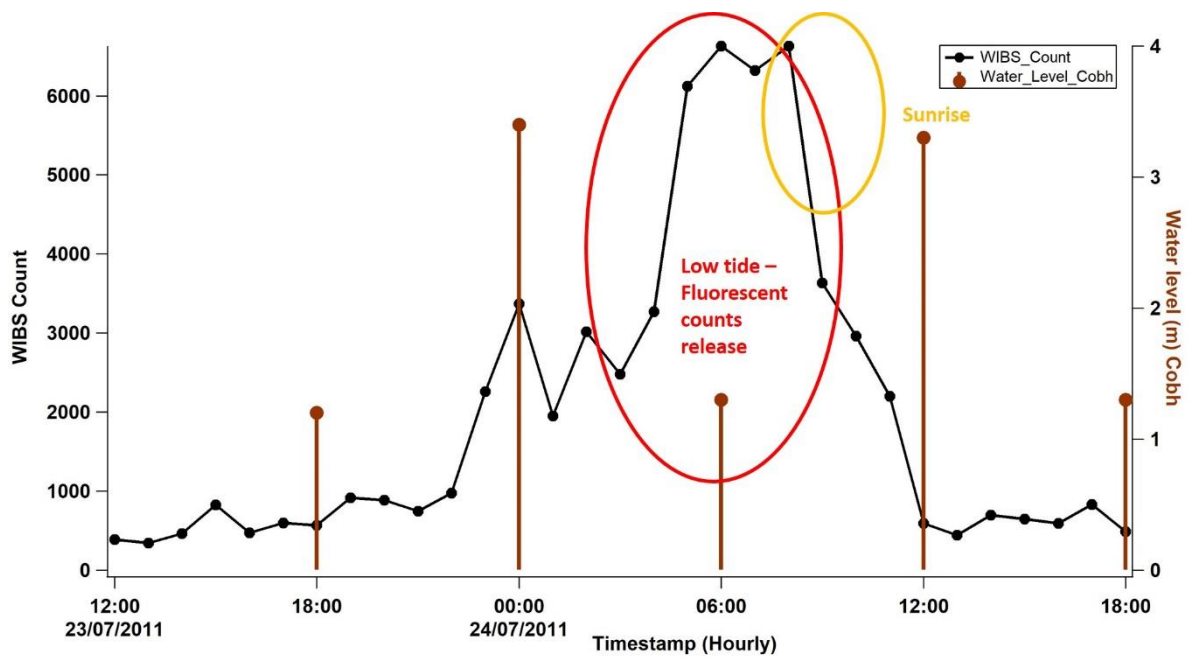

Figure 2: WIBS count, solar and tidal profiles of Haulbowline during the 23<sup>th</sup>-25<sup>th</sup> July 2011

### July 26<sup>th</sup> – 28<sup>th</sup>

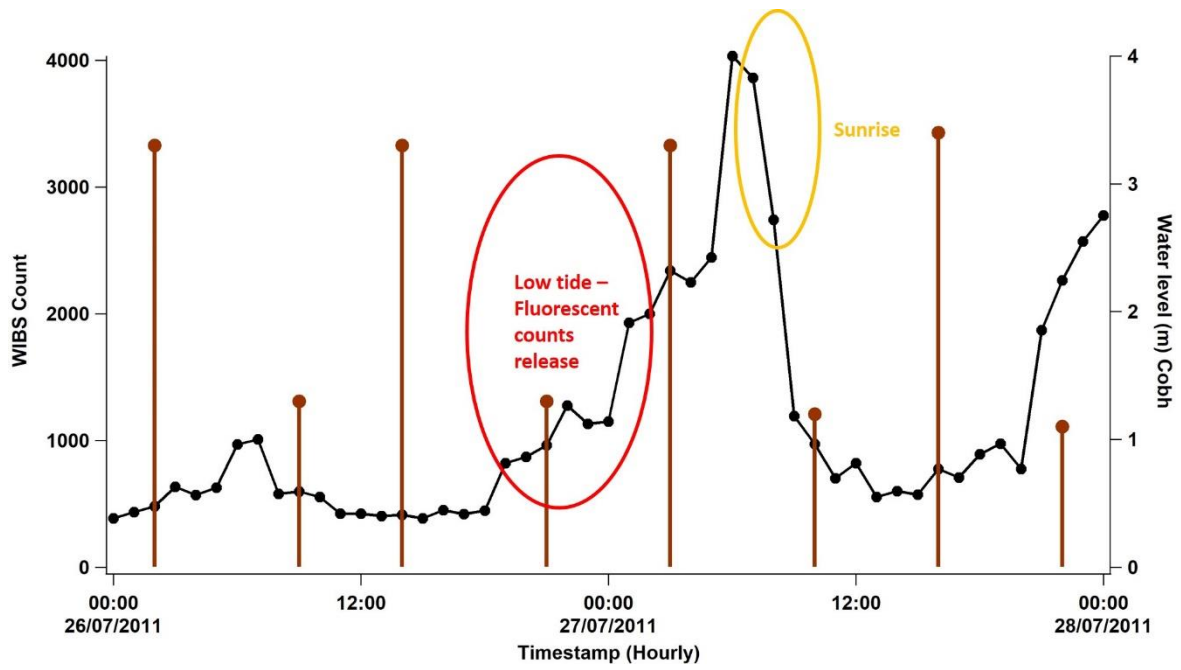

Figure 3: WIBS count, solar and tidal profiles of Haulbowline during the 26<sup>th</sup>-28<sup>th</sup> July 2011
